# Supplementary material for: Multi-compartment kinetic-allometric model of radionuclidebioaccumulation in marine fish
Source: Copernicus journal article supplement (doi:10.5194/bg-2020-423), 2020-11-18
Supplement: Supplementary file 1 [file bg-2020-423-supplement.pdf]

**Supplementary materials to the paper “Multi-compartment kinetic-allometric model of radionuclide bioaccumulation in marine fish”**

Table S1. Parameters of MCKA model for fish of different mass

| $m$ , kg | $K_f$ , kg/(kg d) | $K_w$ , m <sup>3</sup> /(kg d) | $\lambda_3$ , d <sup>-1</sup> | $\lambda_4$ , d <sup>-1</sup> | $\lambda_5$ , d <sup>-1</sup> |
|----------|-------------------|--------------------------------|-------------------------------|-------------------------------|-------------------------------|
| 0.0002   | 0.1               | 0.67                           | 0.058                         | 0.0085                        | 0.231                         |
| 0.006    | 0.043             | 0.29                           | 0.025                         | 0.0036                        | 0.099                         |
| 0.2      | 0.018             | 0.12                           | 0.011                         | 0.0015                        | 0.041                         |
| 4        | 0.0085            | 0.057                          | 0.005                         | 0.0007                        | 0.019                         |

Table S2 Values of sensitivity index  $SI$ .

| Element           | $AE_f$ | $AE_w$ | $\alpha_f$ | $\alpha_w$ | $\alpha_3$ | $\alpha_4$ | $\alpha_5$ | $CR_3$ | $CR_4$ | $CR_5$ |
|-------------------|--------|--------|------------|------------|------------|------------|------------|--------|--------|--------|
| <sup>137</sup> Cs | 0.676  | 0.229  | 0.676      | 0.229      | 0.643      | 0.014      | 0.131      | 0.702  | 0.032  | 0.136  |
| <sup>90</sup> Sr  | 0.473  | 0.525  | 0.473      | 0.525      | 0.352      | 0.133      | 0.436      | 0.396  | 0.264  | 0.449  |
| <sup>60</sup> Co  | 0.729  | 0.079  | 0.729      | 0.079      | 0.234      | 0.016      | 0.632      | 0.267  | 0.034  | 0.647  |

Table S3. Main parameters of boxes around Forsmark NPP

| Box number    | Volume, km <sup>3</sup> | Depth, m | Area, km <sup>2</sup> | Exchange rate with<br>outer box, km <sup>3</sup> y <sup>-1</sup> |
|---------------|-------------------------|----------|-----------------------|------------------------------------------------------------------|
| 68            | 35.7                    | 32.5     | 1100                  | 3355*                                                            |
| "inner box"   | 3.0                     | 12.5     | 240                   | 140                                                              |
| "coastal box" | 0.076                   | 11.0     | 6.9                   | 30                                                               |

\* total exchange rate with all neighbouring boxes

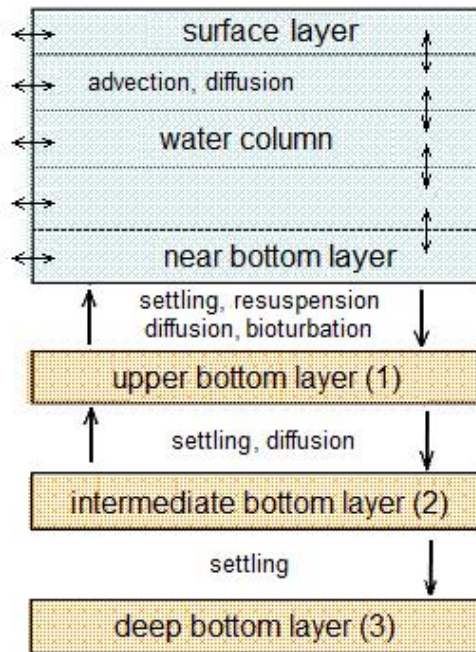

**Fig.S1.** Vertical structure and radionuclide transfer processes in the compartment model POSEIDON-R (Maderich et al., 2018b).

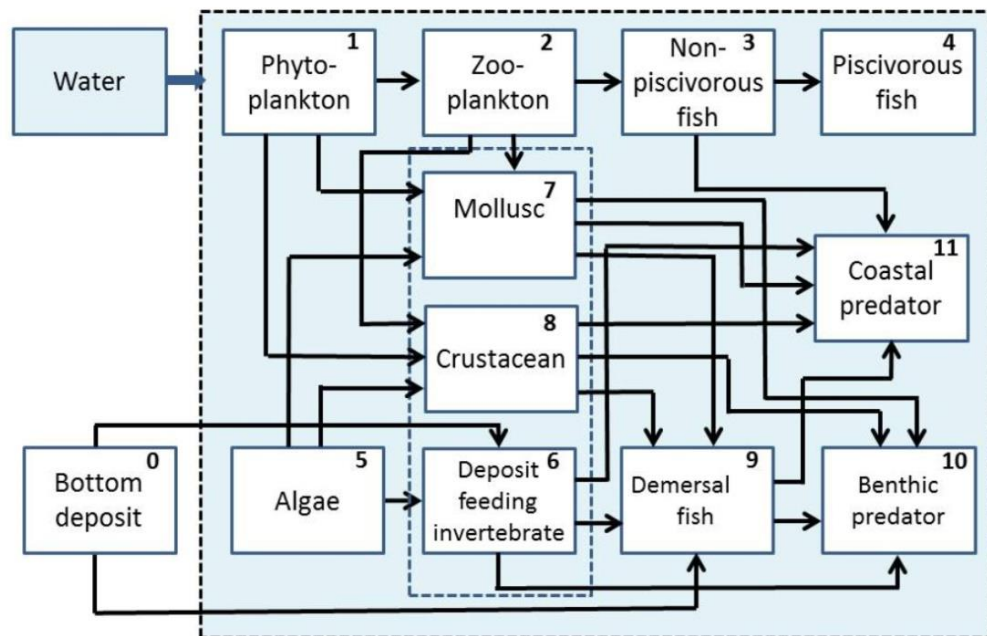

**Fig. S2.** Radionuclide transfer from the water and bottom sediment boxes to marine organisms (Bezhenar et al., 2016). The radionuclide transfers among marine food web compartments are given for 11 types of marine organisms.
